# Supplementary material for: Prevalence of impaired renal function among childless men as compared to fathers: A population-based study
Source: Research Square preprint supplement (doi:10.21203/rs.3.rs-3395775/v1), 2023-10-06
Supplement: Supplementary file 1 [file 792b5e5d719cafdb5804ba4e.xlsx]

## Sheet: Renal function (Table 2)
			Table 2. Likelihood of dipstick proteinuria and eGFR < 60 ml/min/1.73m2 at baseline screening in childless men, when compared to fathers.
				Unadjusted model		Adjusted model 1		Adjusted model 2
				Odds ratio (95% CI)	P-value	Odds ratio (95% CI)	P-value	Odds ratio (95% CI)	P-value
			Dipstick proteinuria	2.18 (1.41-3.36)	<0.001	1.80 (1.10-2.97)	0.02	1.78 (1.11-2.84)	0.016
			eGFR < 60 ml/min/1.73m2	1.36 (1.08-1.70)	0.008	1.54 (1.20-1.97)	<0.001	1.12 (0.87-1.43)	0.39
			eGFR < 60 ml/min/1.73m2 with dipstick proteinuria	6.35 (1.86-21.7)	0.003	6.03 (1.69-21.5)	0.006	5.67 (1.59-20.2)	0.008
			Covariates in adjusted model 1: marital status (married vs unmarried, divorced or widower) and social class (non-manual employee [high, medium, or low level], manual employee [skilled or unskilled], or self-employed)
			Covariates in adjusted model 2: age, marital status (married vs unmarried, divorced or widower), smoking status (yes/no), hypertension, diabetes, obesity and hyperlipidemia.
			Dipstick proteinuria defined as +1 or +2 dipstick result.
